# Supplementary material
Source: MDPI journal article supplement (https://www.mdpi.com/2076-3417/11/9/4151)
Supplement: s1 [file s1]

# Iamus

## Opus #1

♩ = ca. 60

Flute

Clarinet in B  $\flat$

Horn in F

Violin

Violoncello

5

Fl.

Cl.

Hn.

Vln.

Vc.

10

Fl.

Cl.

Hn.

Vln.

Vc.

14

Fl.  
Cl.  
Hn.  
Vln.  
Vc.

*fff*

*fff*

*fff*

Detailed description: This system covers measures 14 to 17. The Flute (Fl.) part has rests in measures 14 and 15, then plays a melodic line in measure 16. The Clarinet (Cl.) part has rests in measures 14 and 15, then enters in measure 16 with a *fff* dynamic. The Horn (Hn.) part plays a rhythmic pattern of eighth notes throughout. The Violin (Vln.) part has rests in measures 14 and 15, then plays a melodic line in measure 16. The Violoncello (Vc.) part has rests in measures 14 and 15, then enters in measure 16 with a *fff* dynamic.

18

Fl.  
Cl.  
Hn.  
Vln.  
Vc.

*fff*

*fff*

*fff*

Detailed description: This system covers measures 18 to 21. The Flute (Fl.) part has rests in measures 18 and 19, then plays a melodic line in measure 20 with a *fff* dynamic. The Clarinet (Cl.) part has rests in measures 18 and 19, then enters in measure 20. The Horn (Hn.) part plays a rhythmic pattern of eighth notes throughout. The Violin (Vln.) part plays a melodic line throughout. The Violoncello (Vc.) part has rests in measures 18 and 19, then enters in measure 20 with a *fff* dynamic.

22

Fl.  
Cl.  
Hn.  
Vln.  
Vc.

Detailed description: This system covers measures 22 to 25. The Flute (Fl.) part has rests in measures 22 and 23, then plays a melodic line in measure 24. The Clarinet (Cl.) part has rests in measures 22 and 23, then enters in measure 24. The Horn (Hn.) part plays a rhythmic pattern of eighth notes throughout. The Violin (Vln.) part plays a melodic line throughout. The Violoncello (Vc.) part has rests in measures 22 and 23, then enters in measure 24.

25

Fl.

Cl.

Hn.

Vln.

Vc.

*fff*

*fff*
