# Supplementary material
Source: MDPI journal article supplement (https://www.mdpi.com/2076-3417/11/9/4151)
Supplement: s1 [file s1]

in memoriam *Raymond Scott*

# Hello World!

(2011)

for violin, clarinet in B $\flat$ , and piano

Iamus Computer  
(2010)

Lentamente,  $\text{♩} = \text{ca. } 42$

Violin  
*mp dim.*

Clarinet in B $\flat$   
*mp dim.* *tr*

Piano  
*mp dim.*

5

Vln.  
*p* *pp dolce*

Cl.  
*p* *pp dolce*

Pno.  
*p* *pp dolce* *tr*

11 poco accel.  $\text{♩} = \text{ca. } 66$

Vln. *p* *mp* 6

Cl. *pp* *p* *mp* fluttertongue 3

Pno. *p* *mp* 3  $8^{\text{vb}}$   $8^{\text{vb}}$

15

Vln. *mf* *f con brio* 3 3

Cl. *mf* *f con brio* 3 3

Pno. *mf* *f con brio* 3 3

18

Vln. *mp*

Cl. *mp* 3 3

Pno. *mp* 3 tr~  $8^{\text{vb}}$

21

Vln. *dim.*

Cl. *dim.*

Pno. *dim.*

24 **Calmandosi ...** **Meno mosso, ♩ = 42**

Vln. *pp*

Cl. *pp*

Pno. *pp* *trill*

27

Vln. *pp* *cresc.*

Cl. *pp* *cresc.*

Pno. *pp* *cresc.*

8<sup>vb</sup>

31

Vln. *tr* *gliss.* *mp* *mf* *pp*

Cl. *mf* *pp*

Pno. *mp* *mf* *pp* *8<sup>va</sup>* *8<sup>vb</sup>*

35

Vln. *cresc.*

Cl. *cresc.* *fluttertongue* *ord. 3*

Pno. *cresc.*

38 **Pochissimo più mosso, ♩ = ca. 48**

Vln. *p* *tr*

Cl. *p* *tr*

Pno. *p*

41

Vln. *pp*

Cl. *pp* slap ord.

Pno. *pp*

45

Vln. *p* accel.

Cl. *p*

Pno. *p* accel. *8va*

48

Vln. *mf*  $\text{♩} = \text{ca. } 66$

Cl.  $\text{♩} = \text{ca. } 66$

Pno.  $\text{♩} = \text{ca. } 66$  *tr*

52

Vln. *pp* *p*

Cl. *mf* *pp* *p*

Pno. *mf* *pp* *p*

55

Vln. *mp*

Cl. *mp* slap 3 ord. 3

Pno. *mp* 3

58

Vln. *f con brio* 3 3 3

Cl. *f con brio* 3 fluttertongue 3 ord.

Pno. *f con brio* 3

60 *poco rall.*  $\text{♩} = 42$   
Vln. *mf dim.*  
Cl. *mf dim.*  
Pno. *mf dim.* *8va* 6 6

63 *f* *pp*  
Vln. *f* *pp*  
Cl. *f* *pp* *slap* *ord. 3*  
Pno. *f* *pp* *15ma* 3 3 3 3

66 *mp*  
Vln. *mp*  
Cl. *mp*  
Pno. *mp* *tr* 3 3 3 6

69

Vln. *mp*

Cl. *mp*

Pno. *mp*

72

Vln. *mf* *ppp* *p mesto*

Cl. *mf* *ppp* *p mesto*

Pno. *mf* *ppp* *p mesto*

76

Vln.

Cl. *p*

Pno. *p*



81 poco accel. . . . . ♩ = ca. 66

Vln. *ppp*

Cl. *ppp*

Pno. *ppp*

88

Vln. *mf* *pp* pizz.

Cl. *mf* *pp*

Pno. *mf* *pp*

91 arco.

Vln. *mp*

Cl. *mp*

Pno. *mp*

8vb

94

Vln. *mf* *pp*

Cl. *mf* *pp*

Pno. *mf* *pp*

fluttertongue

ord.

8<sup>vb</sup>

99

Vln.

Cl. *pp*

Pno.

slap

102 *poco rit.* ♩ = 42

Vln. *pp*

Cl. *pp*

Pno. *poco rit.* ♩ = 42

8<sup>va</sup>

105

Vln. *pp* *f subito* dim.

Cl. *f subito* fluttertongue dim. ord.

Pno. *f subito* dim.

107

Vln. *pp*

Cl. *pp*

Pno. *pp*

110

Vln. *f*

Cl. *f*

Pno. *f*

113 *Avvivando al ...*

Vln.

Cl.

Pno.

8<sup>vb</sup>

115 *J = ca. 66*

Vln.

Cl.

Pno.

*mf* *pp*

*mf* *pp*

*mf* *pp*

(8)

117

Vln.

Cl.

Pno.

*p* *mp*

*p* *mp*

*p* *mp*

*tr*

120

Vln.

Cl.

Pno.

123

Vln.

Cl.

Pno.

*tr*

*dim.*

$\text{♩} = 42$

127

Vln.

Cl.

Pno.

*mp dim.*

*pp*

*pp*

*pp*

*pp*

*pp*

133

Vln.

Cl.

Pno.

pp

Detailed description: This system of music covers measures 133 to 138. The Violin (Vln.) part begins with a long note in measure 133, followed by a trill in measure 138. The Clarinet (Cl.) part features a melodic line with a trill in measure 138. The Piano (Pno.) part has a complex texture with a triplet in measure 136 and a *pp* dynamic marking in measure 138.

139

Vln. pizz.

Cl.

Pno.

Detailed description: This system covers measures 139 to 142. The Violin (Vln.) part is marked *pizz.* (pizzicato) and consists of short, rhythmic notes. The Clarinet (Cl.) part has a melodic line with a slur. The Piano (Pno.) part features a complex texture with many chords and moving lines in both hands.

143

Vln.

Cl.

Pno.

Detailed description: This system covers measures 143 to 146. The Violin (Vln.) part has a rhythmic pattern of notes and rests. The Clarinet (Cl.) part has a melodic line with a slur. The Piano (Pno.) part features a complex texture with many chords and moving lines in both hands.
